# Supplementary material for: Circular RNA hsa_circ_0056836 functions an oncogenic gene in hepatocellular carcinoma through modulating miR-766-3p/FOSL2 axis
Source: PubMed Central journal article supplement (PMC7041754; doi:10.18632/aging.102756), 2020-02-12
Supplement: aging-12-102756-s001..pdf [file aging-12-102756-s001..pdf]

## SUPPLEMENTARY TABLE

**Supplementary Table 1. Correlation between the clinicopathologic characteristics and Hsa\_circ\_0056836 expression in hepatocellular carcinoma.**

| Characteristics           | Hsa_circ_0056836        |                          | <i>P</i> |
|---------------------------|-------------------------|--------------------------|----------|
|                           | Low expression (n = 38) | High expression (n = 38) |          |
| Age (yrs)                 | < 50                    | 13                       | 0.316    |
|                           | ≥50                     | 25                       |          |
| Gender                    | Male                    | 27                       | 0.472    |
|                           | Female                  | 8                        |          |
| Tumor size (cm)           | < 5                     | 7                        | 0.004*   |
|                           | ≥5                      | 37                       |          |
| HBV infection             | Absent                  | 11                       | 0.208    |
|                           | Present                 | 26                       |          |
| Serum AFP level (ng/mL)   | < 20                    | 12                       | 0.326    |
|                           | ≥20                     | 27                       |          |
| Cirrhosis                 | Absent                  | 12                       | 0.342    |
|                           | Present                 | 25                       |          |
| Tumor nodule number       | 1                       | 26                       | 0.574    |
|                           | ≥2                      | 11                       |          |
| Venous infiltration       | Absent                  | 16                       | 0.262    |
|                           | Present                 | 19                       |          |
| Edmondson-Steiner grading | I/II                    | 29                       | 0.032*   |
|                           | III/IV                  | 9                        |          |
| TNM stage                 | I/II                    | 24                       | 0.005*   |
|                           | III/IV                  | 10                       |          |
